# Supplementary material
Source: PubMed Central journal article supplement (PMC7056773)
Supplement: 12264_2019_431_MOESM1_ESM.pdf [file 12264_2019_431_MOESM1_ESM.pdf]

Supplementary Material

**Dopamine D2 Receptor-Mediated Modulation of Rat Retinal Ganglion Cell Excitability**

Ning Yin<sup>#</sup>, Yu-Long Yang<sup>#</sup>, Shuo Cheng, Hong-Ning Wang, Xin Hu, Yanying Miao, Fang Li, Zhongfeng Wang<sup>\*</sup>

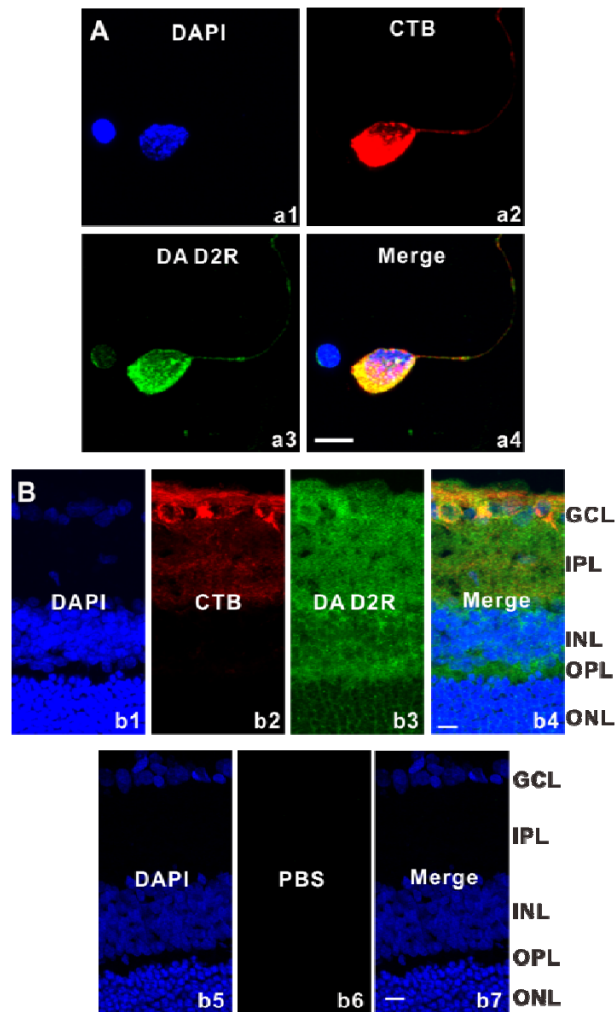

**Fig. S1. Dopamine D2 receptors are expressed on rat RGCs.** (A) Confocal laser microphotographs showing that a dissociated rat RGC retrogradely labeled by CTB (red) (a2) was double-stained with dopamine D2 receptor (D2R) (a3, a4). (B) Confocal laser microphotographs of a rat retinal vertical section showing that CTB-labeled RGCs (red) (b2) were double-labeled by antibody against D2R (green) (b3). Immunofluorescence labeling showed that no positive signals were seen when

the primary antibody of D2R was replaced by PBS (b5-b7). Scale bars: 10  $\mu\text{m}$ . GCL, ganglion cell layer; IPL, inner plexiform layer; INL, inner nuclear layer; OPL, outer plexiform layer; ONL outer nuclear layer.
